# Supplementary material for: Natural variation in photosynthetic capacity, growth, and yield in 64 field-grown wheat genotypes
Source: PubMed Central journal article supplement (PMC4144772; doi:10.1093/jxb/eru253), 2014-06-24
Supplement: supp_eru253_Driever_et_al_Suppl_figures_and_tables.pdf [file supp_eru253_Driever_et_al_Suppl_figures_and_tables.pdf]

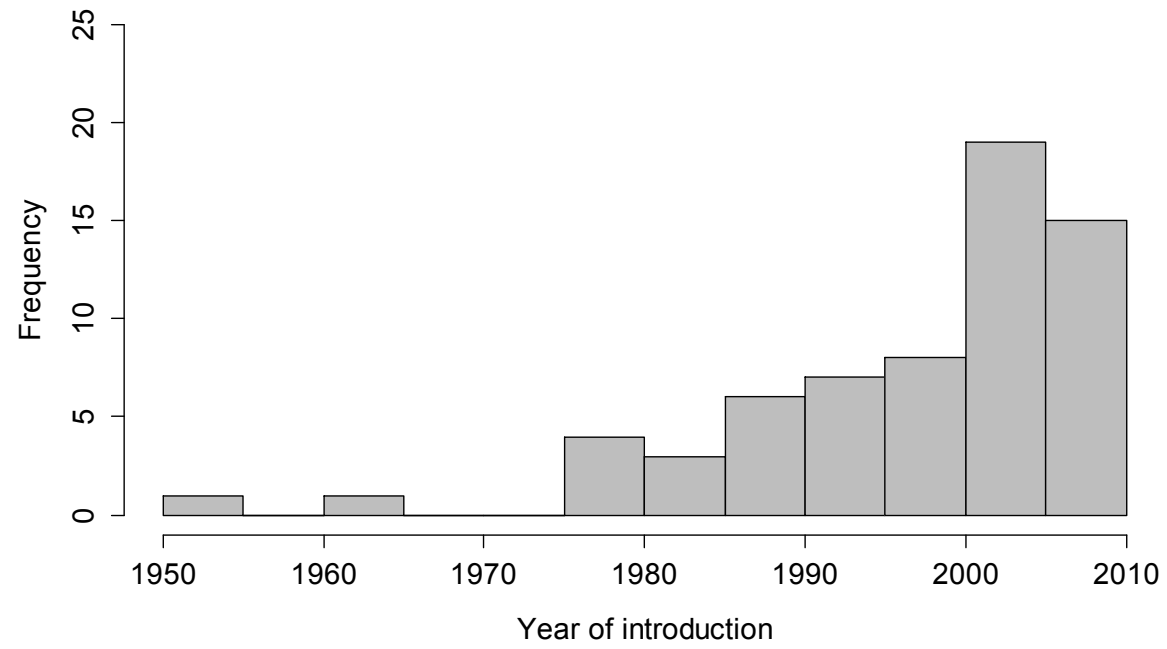

**Suppl. Figure 1.** Frequency distribution (histogram) of cultivars for years of introduction as used in the current study.

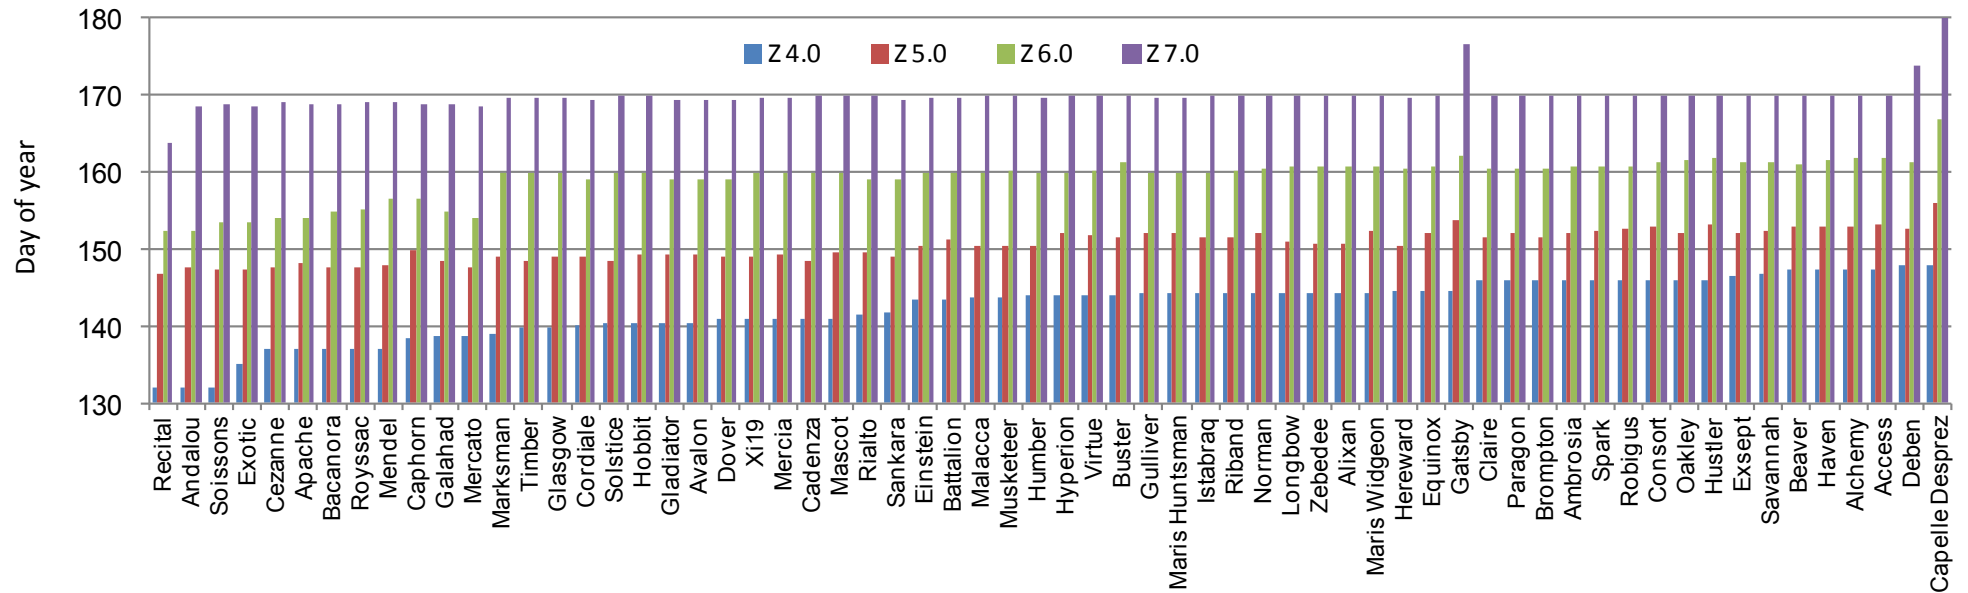

**Suppl. Figure 2.** Development of cultivars over time (Zadoks scale). The times taken for each variety to reach key growth stages are indicated. 4.0 = flag leaf fully emerged/start of booting; 5.0 = start of ear emergence; 6.0 = start of anthesis; 7.0 = start of milk development in kernel.

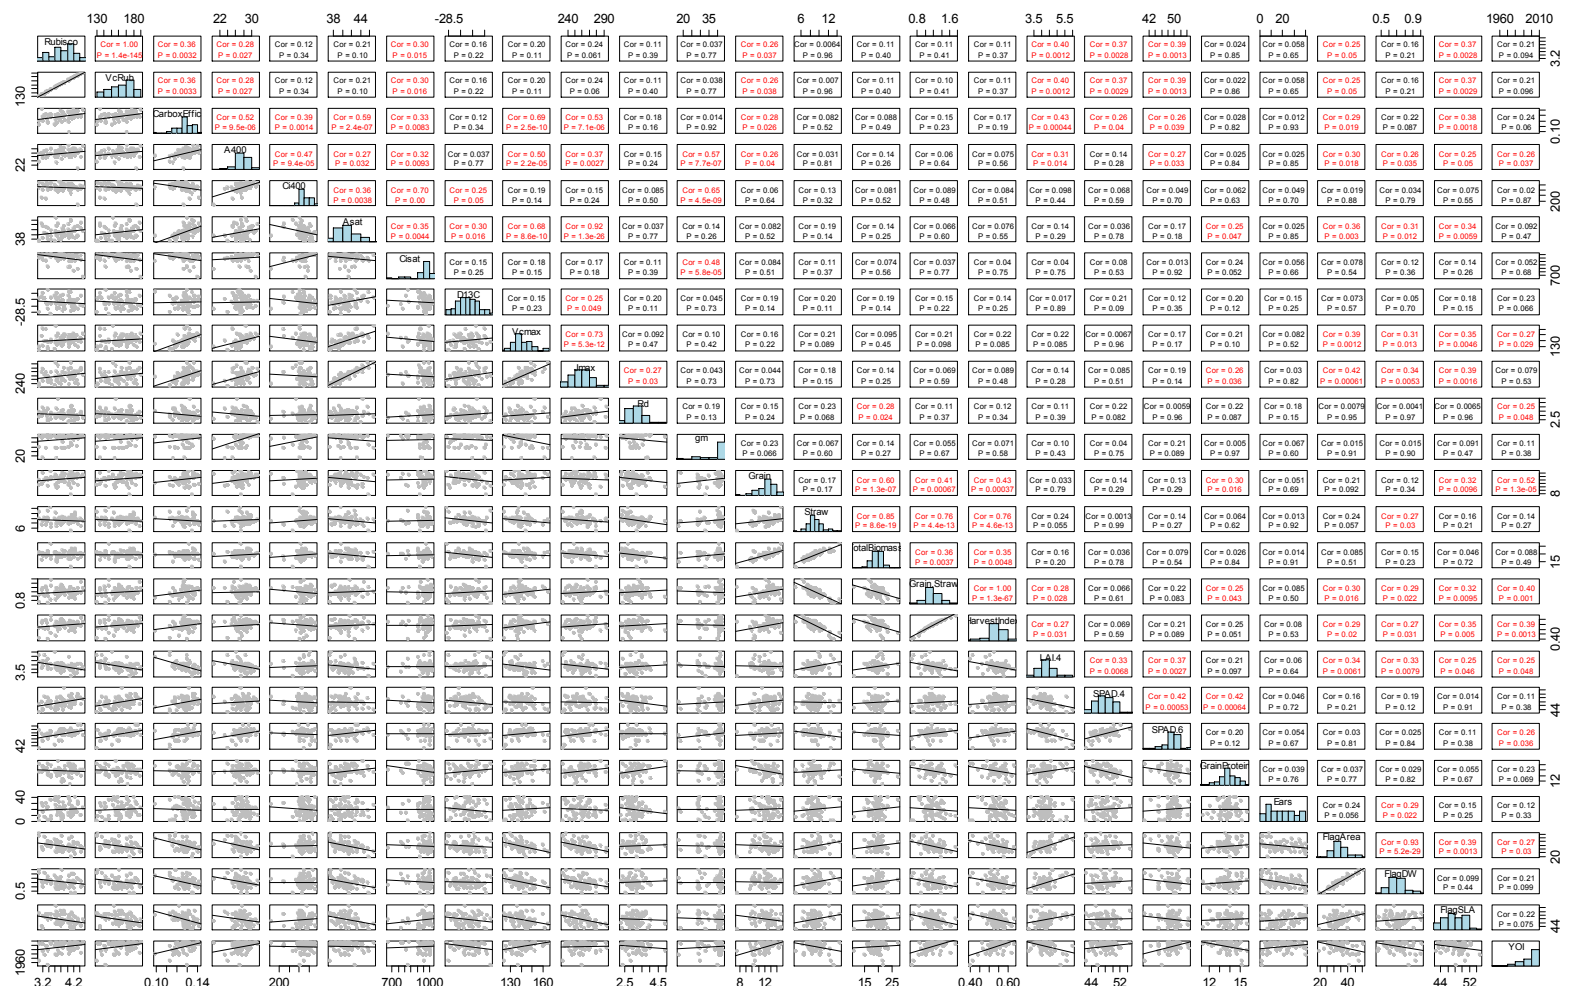

**Suppl. Figure 3.** Meta-analysis of all cultivars for relationships between measured parameters with correlation and significance (upper panels), frequency distribution per parameter (histograms, diagonal panels) and regression plots (lower panels). Names of measured parameters are given in the histogram titles.

**Suppl. Table 1.** Daily mean light levels during the period of photosynthetic measurements

| Day of year | Daily mean solar PAR<br>( $\mu\text{mol m}^{-2} \text{s}^{-1}$ ) |
|-------------|------------------------------------------------------------------|
| 132         | 77.2                                                             |
| 133         | 257.6                                                            |
| 134         | 208.8                                                            |
| 135         | 246.5                                                            |
| 136         | 82.6                                                             |
| 137         | 113.7                                                            |
| 138         | 249.6                                                            |
| 139         | 197.6                                                            |
| 140         | 99.1                                                             |
| 141         | 188.1                                                            |
| 142         | 67.4                                                             |
| 143         | 137.1                                                            |
| 144         | 224.2                                                            |
| 145         | 215.3                                                            |
| 146         | 198.25                                                           |
| 147         | 330.9                                                            |
| 148         | 332.25                                                           |
